# Supplementary material
Source: ML conference proceedings conference paper supplement (https://www.ecva.net/papers/eccv_2020/papers_ECCV/html/123560664_ECCV_2020_paper.php)
Supplement: Supplementary file 1 [file 123560664-supp.zip]

# Progressive Transformers for End-to-End Sign Language Production: Supplementary Material

Ben Saunders, Necati Cihan Camgoz, and Richard Bowden

University of Surrey  
{b.saunders,n.camgoz,r.bowden}@surrey.ac.uk

In this supplementary material, we give further qualitative results for our Progressive Transformer SLP model. We share snapshot examples of produced sign pose sequences in Figures 1 and 2, showing (a) input spoken language alongside (b) produced sign pose sequence, with (c) ground truth pose and (d) original video provided for comparison.

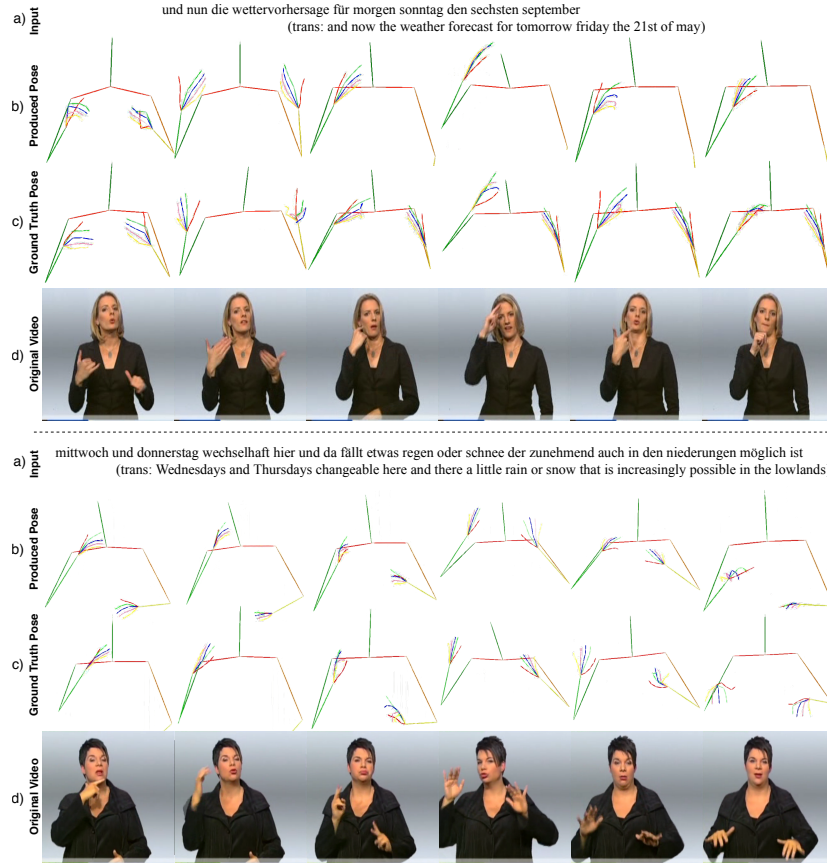

**Fig. 1.** Sign language production examples showing (a) spoken language input, (b) produced sign pose, (c) ground truth pose and (d) original video.

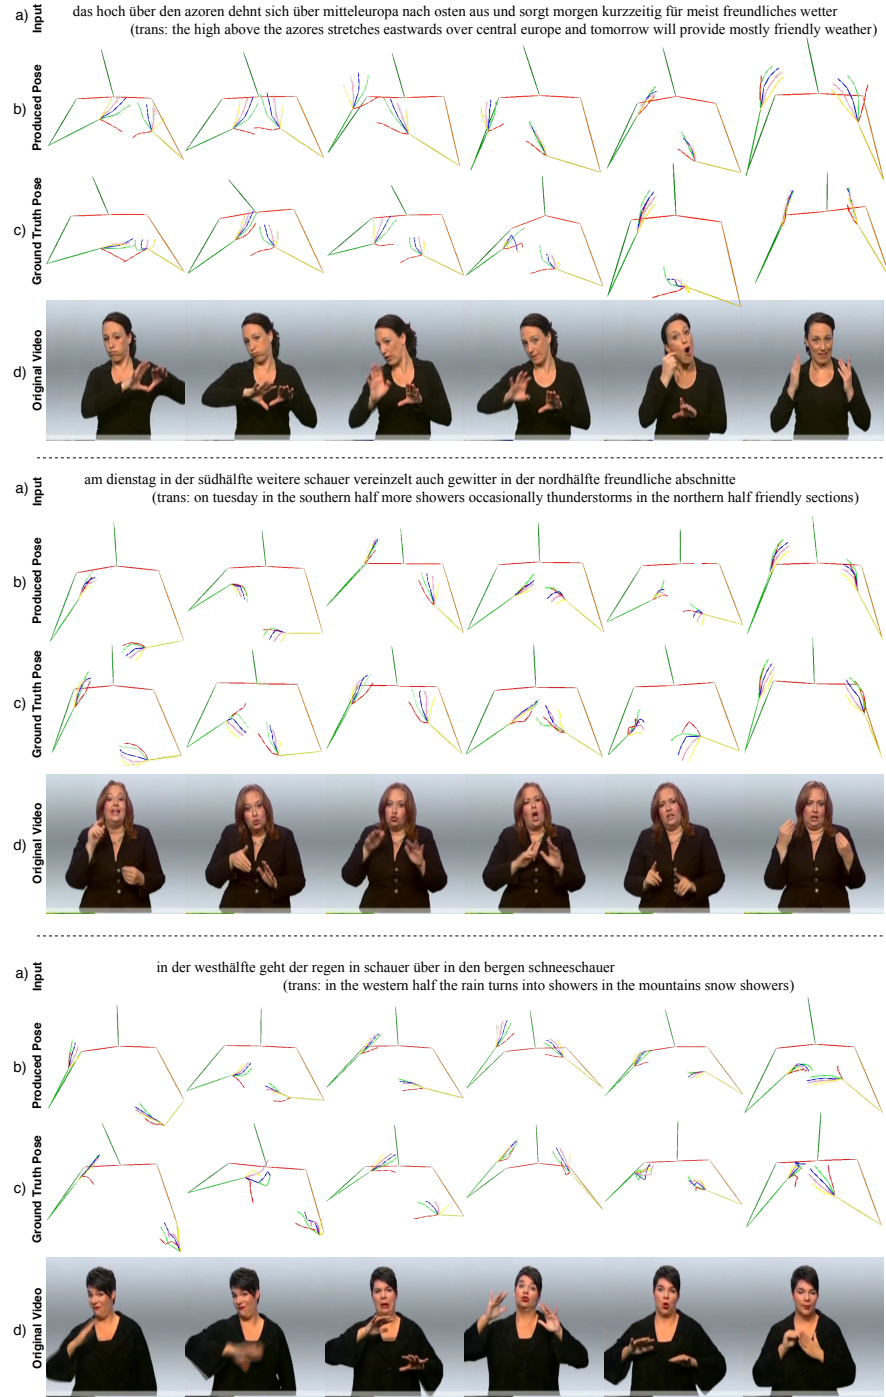

**Fig. 2.** Sign language production examples showing (a) spoken language input, (b) produced sign pose, (c) ground truth pose and (d) original video.
